# Supplementary material
Source: Springer Nature journal article supplement (https://www.springermedizin.de/resource/supplementary/12916_2006_125_MOESM3_ESM.pdf/9599220)
Supplement: MOESM3 [file 9599220]

| Disease or condition                                         | Surveillance objective                                                                   | Action threshold                                                                                                                                      | Response action                                                                                                                                                                                                                                                                                                                                                                                                                                                                            |
|--------------------------------------------------------------|------------------------------------------------------------------------------------------|-------------------------------------------------------------------------------------------------------------------------------------------------------|--------------------------------------------------------------------------------------------------------------------------------------------------------------------------------------------------------------------------------------------------------------------------------------------------------------------------------------------------------------------------------------------------------------------------------------------------------------------------------------------|
| Example of an epidemic-prone disease                         |                                                                                          |                                                                                                                                                       |                                                                                                                                                                                                                                                                                                                                                                                                                                                                                            |
| Cholera                                                      | Detect and respond promptly and appropriately to cases and outbreaks of watery diarrhea. | A single suspected case of cholera.                                                                                                                   | <ul style="list-style-type: none"> <li>• Report case-based information immediately.</li> <li>• Manage and treat the case according to national guidelines.</li> <li>• Enhance strict hand-washing and patient isolation procedures.</li> <li>• Obtain stool specimen from 5 patients within 5 days of onset of acute watery diarrhea and before antibiotic treatment is started.</li> <li>• Conduct case-based investigation to identify similar cases not previously reported.</li> </ul> |
| Example of a disease targeted for eradication or elimination |                                                                                          |                                                                                                                                                       |                                                                                                                                                                                                                                                                                                                                                                                                                                                                                            |
| Poliomyelitis (acute flaccid paralysis - AFP)                | Identify all cases of paralytic poliomyelitis                                            | One suspected case of AFP.                                                                                                                            | <ul style="list-style-type: none"> <li>• Report suspected case immediately.</li> <li>• Conduct case-based investigation.</li> <li>• Obtain 2 or more stool specimens within 14 days of onset of paralysis for viral isolation.</li> <li>• Respond according to national polio program guidelines.</li> </ul>                                                                                                                                                                               |
| Example of a disease that is endemic                         |                                                                                          |                                                                                                                                                       |                                                                                                                                                                                                                                                                                                                                                                                                                                                                                            |
| Malaria                                                      | Monitor impact of program interventions                                                  | When coverage of program interventions is at moderate or high levels, any lack of decline for in-patient deaths in children less than 5 years of age. | <ul style="list-style-type: none"> <li>• Review the efficacy of the program interventions (e.g., resistance to insecticide in the bed net, antimalarial drug resistance).</li> <li>• Evaluate the quality of the data.</li> <li>• Review data for any surveillance biases (e.g., increase or decrease in number of patients due to a change in drug availability).</li> </ul>                                                                                                              |
